# Supplementary material for: Chemical Fractionation, Environmental, and Human Health Risk Assessment of Potentially Toxic Elements in Soil of Industrialised Urban Areas in Serbia
Source: MDPI journal article supplement (doi:10.3390/ijerph18179412), 2021-09-06
Supplement: s1 [file s1]

# **Supplementary Information**

For

## **Chemical fractionation, environmental and human health risk assessment of potentially toxic elements in soil of industrialised urban areas in Serbia**

**Dragana Pavlović<sup>1,\*</sup>, Marija Pavlović<sup>1</sup>, Veljko Perović<sup>1</sup>, Zorana Mataruga<sup>1</sup>, Dragan Čakmak<sup>1</sup>, Miroslava  
Mitrović<sup>1</sup>, Pavle Pavlović<sup>1</sup>**

<sup>1</sup>Department of Ecology, Institute for Biological Research 'Siniša Stanković', University of Belgrade,  
Bulevar despota Stefana 142, 11000 Belgrade, Serbia

E-mail: dragana.pavlovic@ibiss.bg.ac.rs

Tel: +38111 2078358

Fax: +381 11 2761433

\*Corresponding author, <https://orcid.org/0000-0002-3624-706X>

## Tables:

Table S1. Comparison of analyzed and certified values of BCR-701.

Table S2. Background values of PTEs ( $\text{mg kg}^{-1}$  d.w.) in the studied urban soils (method: Median + 2MAD).

Table S3. Classification of Enrichment factor (EF), Contamination factor (Cf), Degree of contamination (Cdeg), Potential ecological risk ( $E_r^i$ ) and potential ecological risk index (RI).

Table S4. Description and values of all parameters associated with health risk assessment for PTEs in soils.

Table S5. Relative bioavailability factor (RBA), oral reference dose (RfDo), dermal absorption fraction (ABSd), gastrointestinal absorption (GIABS), inhalation reference concentration (RfC), oral slope factor (CSFo), and inhalation unit risk (IUR) values for each PTE.

Table S6. Pseudo-total PTE concentrations in the studied urban soils ( $\text{mg kg}^{-1}$  d.w.).

Table S7. Enrichment factor (EF) of PTEs in the studied urban soils.

Table S8. Contamination factor (Cf) of PTEs in the studied urban soils.

Table S9. Ecological risk index ( $E_i$ ) of PTEs in the studied urban soils.

Table S10. Degree of contamination (Cdeg) and Potential Ecological risk (RI) of PTEs in the studied urban soils.

## Figures:

Figure S1. Fractionation profile of Co, Cr and Cu in the studied soils.

Figure S2. Fractionation profile of Fe, Mn and Ni in the studied soils.

Figure S3. Fractionation profile of Pb, Sr and Zn in the studied soils.

## The study area and soil sampling

The study was conducted at five sites exposed to different sources of pollution: Pancevo, Smederevo, Obrenovac, Belgrade and the Arboretum of the Faculty of Forestry (Control site).

Pancevo is located in the southern part of the Autonomous Province of Vojvodina, 20 km from the Serbian capital, Belgrade, between  $20^{\circ}40'00''\text{E}$  and  $44^{\circ}54'00''\text{N}$ , at an average altitude of about 77 m above sea level. Pancevo has a moderate continental climate, characterised by cold winters and long and hot summers. The average annual temperature of Pancevo is  $11.3^{\circ}\text{C}$  and mean annual precipitation is 643 mm. It covers an area of  $148.8\text{ km}^2$  and has a population of about 76000. Pancevo is known as the centre of the Serbian chemical industry, but also as an environmental hotspot because of the high concentration of air pollutants that makes life unbearable for its inhabitants. The major pollution sources in Pancevo are the Pancevo Oil Refinery, the Pancevo Nitric Fertilizer Factory and the Pancevo Petrochemical Industry. Sampling was carried out in the National Garden ( $20^{\circ}39'23''\text{E}$  and  $44^{\circ}51'54''\text{N}$ ), the largest and oldest park in Pancevo, located 1.3 km from the town centre. The distance from the industrial zone to the National Garden is approximately 5 km.

Smederevo is located in central Serbia, 46 km from the Serbian capital, Belgrade, between  $20^{\circ}57'00''\text{E}$  and  $40^{\circ}39'00''\text{N}$ , at an average altitude of about 73 m above sea level. Smederevo has a moderate

continental climate, characterised by hot summers with high precipitation in June and November and cold dry winters. The average annual temperature of Smederevo is 11.9 °C and mean annual precipitation is 650 mm. It covers an area of 484 km<sup>2</sup> (urban area: 38.58 km<sup>2</sup>) and has a population of about 64000 in the urban area of the town. Smederevo is one of the most densely populated towns in the Republic of Serbia. This high concentration of population, industry and transport, as well as agricultural production, has caused an increased degree of land, air and water degradation and pollution. The main source of pollution in Smederevo is the ironworks, located in the industrial zone 7 km southeast of the city centre. The steel plant produces iron in two blast furnaces and then converts the blast furnace iron into raw steel at a three-furnace converter shop and continuous casting complex. Most pollutants are related to agglomeration and the converter steel plant. Sampling was carried out in the central city zone in the National Heroes Park (20°55'33"E and 44°40'00"N).

Obrenovac is located in the north-west part of Serbia, between 20°12'00"E and 44°39'00"N, at an average altitude of about 76 m above sea level. It is one of 17 municipalities of Belgrade and is located at the confluence of the Kolubara and Sava rivers. Obrenovac has a moderate continental climate, characterised by hot summers with high precipitation in May, June and July and a minimum in October and cold winters. The average annual temperature of Obrenovac is 11.0 °C and mean annual precipitation is 647.2 mm. It covers an area of 40.996 km<sup>2</sup> and has a population of about 72000. The main source of pollution in Obrenovac is the thermoelectric power plant "Nikola Tesla A" (TENT A), situated on the right bank of the Sava River, 42 km upstream from the Serbian capital, Belgrade. TENT A produces the largest amount of fly ash (around 3.6 Mt a year) in Serbia. The sampling site in Obrenovac was in the main City park (20°12'50"E and 44°39'16"N), located 4 km away from the source of pollution (the thermoelectric power plant and the fly ash disposal site).

Belgrade is located in south-eastern Europe, on the Balkan Peninsula, between 20°27'44"E and 44°49'14"N, at an average altitude of about 120 m above sea level. Belgrade has a moderate continental climate, with four seasons characterised by cold winters and hot, humid summers with well distributed rainfall. The average annual temperature of Belgrade is 11.9 °C and mean annual precipitation is 685 mm. It covers an area of 359.96 km<sup>2</sup> and has a population of about 1.2 million in the inner city area. The major pollution sources in Belgrade are heating plants powered by crude oil or natural gas, domestic heating (using coal and crude oil as fuel), gasoline and diesel vehicle exhaust emissions, as well as other vehicle emissions. Traffic has been recognized as the main source of air pollution in the central area of Belgrade. Sampling was carried out at two locations in Belgrade: Hall Pioneer Park (20°28'58"E and 44°48'51"N) in the central zone of the city, one of the most polluted areas of the city, and the Arboretum of the Faculty of Forestry – the control site (20°25'23"E and 44°46'57"N), which is a protected natural area and a valuable archive of domestic and foreign tree species in Belgrade. It is located in an area without a direct source of pollution, 10 km away from the city centre, within a zone of mixed *Quercus frainetto* and *Quercus cerris* forest.

At each sampling site, the soil was sampled at eight sampling points. The sampling sites were chosen based on proximity of industrial plants and heavy traffic.

**Table S1.** Comparison of analyzed and certified values of BCR-701.

|        |            | Cd        | Cr        | Cu       | Ni       | Pb        | Zn        |
|--------|------------|-----------|-----------|----------|----------|-----------|-----------|
| Step 1 | Analyzed   | 6.7±0.37  | 2.03±0.12 | 48.3±1.4 | 14.9±0.8 | 2.98±0.22 | 201.7±6.2 |
|        | Certified  | 7.3±0.4   | 2.26±0.16 | 49.3±1.7 | 15.4±0.9 | 3.18±0.21 | 205±6     |
|        | % Recovery | 91.8      | 89.8      | 97.9     | 96.7     | 93.7      | 98.4      |
| Step 2 | Analyzed   | 3.65±0.31 | 44.9±3.1  | 126.1±4  | 27.2±1.5 | 127.7±3.2 | 120.4±5.9 |
|        | Certified  | 3.77±0.28 | 45.7±2.0  | 124±3    | 26.6±1.3 | 126±3     | 114±5     |
|        | % Recovery | 96.8      | 98.24     | 101.7    | 102.2    | 101.3     | 105.6     |
| Step 3 | Analyzed   | 0.23±0.08 | 137.8±6.9 | 60.9±4.2 | 16.7±1.1 | 8.7±1.8   | 48.8±4.3  |
|        | Certified  | 0.27±0.06 | 143±7     | 55±4.0   | 15.3±0.9 | 9.3±2.0   | 46±4.0    |
|        | % Recovery | 85.1      | 96.4      | 110.7    | 109.2    | 93.5      | 106.0     |

**Table S2.** Background values of PTEs (mg kg<sup>-1</sup> d.w.) in the studied urban soils (Mrvić et al. 2009; 2011; Knežević 2014).

| City      | Co   | Cr    | Cu    | Fe       | Mn     | Ni     | Pb    | Sr     | Zn     |
|-----------|------|-------|-------|----------|--------|--------|-------|--------|--------|
| Pancevo   | 6.73 | 47.51 | 37.80 | 50351.84 | 689.55 | 49.32  | 25.11 | 77.79  | 96.45  |
| Smederevo | 6.97 | 69.00 | 58.50 | 23911.08 | 620.52 | 103.00 | 53.50 | 137.91 | 115.00 |
| Obrenovac | 8.76 | 79.00 | 28.00 | 41266.52 | 863.70 | 131.00 | 35.12 | 107.31 | 74.00  |
| Belgrade  | 6.74 | 61.00 | 30.00 | 24771.00 | 489.29 | 72.00  | 37.00 | 223.41 | 68.00  |

**Table S3.** Classification of Enrichment factor (EF), Contamination factor (Cf), Degree of contamination (Cdeg), Potential ecological risk ( $E_r^i$ ) and potential ecological risk index (RI).

| EF                |                           | Cf    |                            | Cdeg  |                                      | $E_r^i$                |                                        | RI      |                              |
|-------------------|---------------------------|-------|----------------------------|-------|--------------------------------------|------------------------|----------------------------------------|---------|------------------------------|
| EF <2             | Minimal enrichment        | < 1   | low contamination          | <8    | low degree of contamination          | <40                    | Low potential ecological risk          | <150    | Low ecological risk          |
| $2 \leq EF < 5$   | Moderate enrichment       | 1 - 3 | moderate contamination     | 8-16  | moderate degree of contamination     | $40 \leq E_r^i < 80$   | Moderate potential ecological risk     | 150-300 | Moderate ecological risk     |
| $5 \leq EF < 20$  | Significant enrichment    | 3 - 6 | considerable contamination | 16-32 | considerable degree of contamination | $80 \leq E_r^i < 160$  | Considerable potential ecological risk | 300-600 | Considerable ecological risk |
| $20 \leq Ef < 40$ | Very high enrichment      | > 6   | very high contamination    | >32   | very high degree of contamination    | $160 \leq E_r^i < 320$ | High potential ecological risk         | >600    | Very high ecological risk    |
| $\geq 40$         | Extremely high enrichment |       |                            |       |                                      | $\geq 320$             | Very high potential ecological risk    |         |                              |
| Source            | Chen et al., (2019)       |       |                            |       | Hakanson, (1980)                     |                        |                                        |         |                              |

**Table S4.** Description and values of all parameters associated with health risk assessment for PTEs in soils.

| Symbol                 | Parameters (units)                                                                                                                                            | Values                                                                               | References                                                                     |
|------------------------|---------------------------------------------------------------------------------------------------------------------------------------------------------------|--------------------------------------------------------------------------------------|--------------------------------------------------------------------------------|
| C                      | PTE concentration (mg/kg)                                                                                                                                     |                                                                                      | Site specific                                                                  |
| IRS <sub>res-c</sub>   | Resident Soil Ingestion Rate - Child (mg/day)                                                                                                                 | 200                                                                                  | USEPA, 2020a                                                                   |
| IRS <sub>res-a</sub>   | Resident Soil Ingestion Rate - Adult (mg/day)                                                                                                                 | 100                                                                                  | USEPA, 2020a                                                                   |
| RBA                    | relative bioavailability factor                                                                                                                               | Arsenic=0.6<br>All Others=1                                                          | USEPA, 2020a                                                                   |
| EF <sub>res</sub>      | Resident Exposure Frequency Adult, Child (days/year)                                                                                                          | 350                                                                                  | USEPA, 2020a                                                                   |
| ED <sub>res-c</sub>    | Resident Exposure Duration - child (years)                                                                                                                    | 6                                                                                    | USEPA, 2020a                                                                   |
| ED <sub>res-a</sub>    | Resident Exposure Duration - adult (years)                                                                                                                    | 20                                                                                   | ED <sub>res</sub> (26 years)-<br>ED <sub>res-c</sub> (6 years)<br>USEPA, 2020a |
| BW <sub>res-c</sub>    | Resident Body Weight - child (kg)                                                                                                                             | 15                                                                                   | USEPA, 2020a                                                                   |
| BW <sub>res-a</sub>    | Resident Body Weight - adult (kg)                                                                                                                             | 80                                                                                   | USEPA, 2020a                                                                   |
| AT <sub>res-c</sub>    | Averaging time - resident child (days)                                                                                                                        | 365 x ED <sub>res-c</sub> =2190                                                      | USEPA, 2020a                                                                   |
| AT <sub>res-a</sub>    | Averaging time - resident adult (days)                                                                                                                        | 365 x ED <sub>res</sub> =7300                                                        | USEPA, 2020a                                                                   |
| RfDo                   | Chronic Oral Reference Dose (mg/kg-day)                                                                                                                       | Contaminant specific                                                                 | Table S5                                                                       |
| SA <sub>res-c</sub>    | Resident surface area soil - child (cm <sup>2</sup> /day)                                                                                                     | 2373                                                                                 | USEPA, 2020a                                                                   |
| SA <sub>res-a</sub>    | Resident surface area soil - adult (cm <sup>2</sup> /day)                                                                                                     | 6032                                                                                 | USEPA, 2020a                                                                   |
| AFa                    | Skin adherence factor - adult (mg/cm <sup>2</sup> )                                                                                                           | 0,07                                                                                 | USEPA, 2020a                                                                   |
| AFc                    | Skin adherence factor - child (mg/cm <sup>2</sup> )                                                                                                           | 0,2                                                                                  | USEPA, 2020a                                                                   |
| ABSd                   | Fraction of contaminant absorbed dermally from soil (unitless)                                                                                                | Contaminant specific                                                                 | Table S5                                                                       |
| GIABS                  | Fraction of contaminant absorbed in gastrointestinal tract (unitless) Note: if GIABS is >50% then it is set to 100% for calculation of dermal toxicity values | Contaminant specific<br>Inorganic default=1.0<br>VOC default=1.0<br>SVOC default=1.0 | Table S5                                                                       |
| RfC                    | Chronic Inhalation Reference Concentration (mg/m <sup>3</sup> )                                                                                               | Contaminant specific                                                                 | Table S5                                                                       |
| PEF                    | Particulate Emission Factor - Minneapolis (m <sup>3</sup> /kg)                                                                                                | 1.36 x 10 <sup>9</sup> (region-specific)                                             | USEPA, 2020a                                                                   |
| IFS <sub>res-adj</sub> | Resident Soil Ingestion Rate - age-adjusted (mg/kg)                                                                                                           | Calculated using the age adjusted intake factors equation 36750                      | USEPA, 2020a                                                                   |
| DFS <sub>res-adj</sub> | Resident soil dermal contact factor- age-adjusted (mg/kg)                                                                                                     | Calculated using the age adjusted intake factors equation 103390                     | USEPA, 2020a                                                                   |
| CSFo                   | Oral Slope Factor (mg/kg-day) <sup>-1</sup>                                                                                                                   |                                                                                      | Table S5                                                                       |
| IUR                    | Inhalation Unit Risk (µg/m <sup>3</sup> ) <sup>-1</sup>                                                                                                       | Contaminant specific                                                                 | Table S5                                                                       |
| LT                     | Life time (years)                                                                                                                                             | 76                                                                                   | Site specific                                                                  |
| AT                     | Averaging time (days)                                                                                                                                         | 365*LT=27740<br>(Carcinogenic)                                                       | Site specific                                                                  |

**Table S5.** Relative bioavailability factor (RBA), oral reference dose (RfDo), dermal absorption fraction (ABSd), gastrointestinal absorption (GIABS), inhalation reference concentration (RfC), oral slope factor (CSFo), and inhalation unit risk (IUR) values for each PTE.

| <b>Metal</b>   | <b>RBA</b>    | <b>RfDo</b>         | <b>ABSd</b> | <b>GIABS</b> | <b>RfC</b>             | <b>CSFo</b>           | <b>IUR</b>              |
|----------------|---------------|---------------------|-------------|--------------|------------------------|-----------------------|-------------------------|
| <b>Co</b>      | 1             | 0.0003              | 0.001       | 1            | 0.000006               | /                     | 0.009                   |
| <b>Cr (VI)</b> | 1             | 0.003               | 0.001       | 0.025        | 0.0001                 | 0.5                   | 0.0840                  |
| <b>Cu</b>      | 1             | 0.04                | 0.001       | 1            | 0.0024 <sup>b,c</sup>  | /                     | /                       |
| <b>Fe</b>      | 1             | 0.7                 | 0.001       | 1            | /                      | /                     | /                       |
| <b>Mn</b>      | 1             | 0.024               | 0.001       | 0.04         | 0.000050               | /                     | /                       |
| <b>Ni</b>      | 1             | 0.02                | 0.001       | 0.04         | 0.000090               | /                     | 0.0003                  |
| <b>Pb</b>      | 1             | 0.0014 <sup>a</sup> | 0.001       | 1            | 0.0015 <sup>b,c</sup>  | 0.0085 <sup>b,c</sup> | 0.000012 <sup>b,c</sup> |
| <b>Sr</b>      | 1             | 0.6                 | 0.001       | 1            | /                      | /                     | /                       |
| <b>Zn</b>      | 1             | 0.3                 | 0.001       | 1            | / 0.035 <sup>b,c</sup> | /                     | /                       |
| <b>Source</b>  | USEPA (2020b) |                     |             |              |                        |                       |                         |

<sup>a</sup> Jia et al., (2018); <sup>b</sup> USDOE, (2011); <sup>c</sup> Čakmak et al., (2020)

**Table S6.** Pseudo-total PTEs concentrations in the studied urban soils (mg kg<sup>-1</sup> d.w.).

| Sampling point | Co    | Cr    | Cu     | Fe       | Mn     | Ni     | Pb      | Sr     | Zn     |
|----------------|-------|-------|--------|----------|--------|--------|---------|--------|--------|
| Pancevo 1      | 8.96  | 41.40 | 30.18  | 33209.92 | 595.58 | 56.90  | 45.21   | 31.61  | 39.45  |
| Pancevo 2      | 8.85  | 39.55 | 34.48  | 33390.68 | 572.30 | 51.10  | 55.86   | 100.59 | 50.30  |
| Pancevo 3      | 8.12  | 36.17 | 29.41  | 31093.92 | 551.87 | 60.48  | 40.24   | 24.08  | 51.52  |
| Pancevo 4      | 8.78  | 45.52 | 32.80  | 34410.49 | 602.50 | 76.92  | 47.39   | 33.60  | 45.24  |
| Pancevo 5      | 9.17  | 48.37 | 32.81  | 33116.43 | 585.81 | 69.50  | 47.66   | 27.93  | 38.17  |
| Pancevo 6      | 8.72  | 37.87 | 29.92  | 31836.19 | 544.47 | 57.59  | 50.09   | 48.24  | 44.23  |
| Pancevo 7      | 8.23  | 41.87 | 28.47  | 32297.32 | 499.21 | 63.80  | 43.22   | 45.65  | 56.62  |
| Pancevo 8      | 9.25  | 36.97 | 30.87  | 33389.75 | 611.98 | 54.49  | 42.81   | 27.97  | 38.92  |
| Smederevo 1    | 9.87  | 88.61 | 48.56  | 30462.99 | 493.59 | 101.04 | 82.57   | 67.43  | 107.23 |
| Smederevo 2    | 10.29 | 71.31 | 48.35  | 30844.47 | 554.40 | 95.92  | 57.27   | 66.48  | 168.72 |
| Smederevo 3    | 9.16  | 87.18 | 45.46  | 28940.54 | 473.33 | 125.60 | 200.18  | 73.52  | 92.58  |
| Smederevo 4    | 9.80  | 98.82 | 48.64  | 30789.74 | 597.23 | 134.34 | 93.60   | 57.21  | 106.12 |
| Smederevo 5    | 12.09 | 79.87 | 39.03  | 40037.83 | 535.74 | 113.01 | 84.12   | 89.46  | 86.47  |
| Smederevo 6    | 6.72  | 72.05 | 30.58  | 18117.88 | 342.22 | 88.78  | 58.74   | 84.11  | 112.08 |
| Smederevo 7    | 8.43  | 49.46 | 43.63  | 26358.68 | 514.91 | 57.41  | 70.10   | 62.18  | 117.68 |
| Smederevo 8    | 9.31  | 75.49 | 84.07  | 29931.15 | 556.63 | 116.33 | 146.32  | 60.08  | 127.66 |
| Obrenovac 1    | 14.69 | 54.00 | 35.01  | 41141.78 | 912.85 | 85.38  | 53.78   | 31.45  | 43.76  |
| Obrenovac 2    | 13.12 | 56.72 | 42.95  | 36855.54 | 664.16 | 92.20  | 61.44   | 50.16  | 70.94  |
| Obrenovac 3    | 10.29 | 38.37 | 30.80  | 32119.40 | 546.76 | 66.05  | 47.83   | 131.18 | 38.39  |
| Obrenovac 4    | 13.11 | 52.37 | 36.62  | 38475.96 | 706.12 | 88.65  | 69.21   | 47.99  | 50.91  |
| Obrenovac 5    | 8.13  | 28.20 | 23.81  | 25939.71 | 453.31 | 51.32  | 47.74   | 155.61 | 34.82  |
| Obrenovac 6    | 11.53 | 50.59 | 31.78  | 34588.45 | 570.63 | 84.27  | 52.41   | 103.58 | 56.97  |
| Obrenovac 7    | 11.75 | 45.73 | 33.54  | 34641.16 | 640.29 | 75.70  | 53.26   | 84.58  | 48.30  |
| Obrenovac 8    | 11.40 | 39.85 | 33.82  | 33367.29 | 628.24 | 62.01  | 40.44   | 72.06  | 42.30  |
| Belgrade I 1   | 7.99  | 25.53 | 38.36  | 25315.29 | 407.21 | 43.15  | 122.74  | 173.51 | 140.41 |
| Belgrade I 2   | 8.89  | 25.71 | 33.84  | 28728.79 | 476.85 | 47.81  | 56.71   | 190.49 | 60.64  |
| Belgrade I 3   | 8.33  | 26.75 | 36.68  | 28325.58 | 477.74 | 42.68  | 52.69   | 62.20  | 91.58  |
| Belgrade I 4   | 6.48  | 28.01 | 53.47  | 23315.14 | 391.74 | 43.90  | 269.40  | 135.20 | 139.51 |
| Belgrade I 5   | 7.77  | 23.28 | 107.36 | 29617.86 | 423.03 | 38.37  | 1750.38 | 80.54  | 302.36 |
| Belgrade I 6   | 9.07  | 30.28 | 38.33  | 29738.63 | 546.83 | 38.55  | 104.45  | 74.06  | 94.83  |
| Belgrade I 7   | 8.93  | 35.89 | 55.79  | 26735.91 | 418.21 | 61.07  | 193.17  | 163.97 | 199.64 |
| Belgrade I 8   | 9.25  | 24.41 | 34.92  | 29574.29 | 474.49 | 41.25  | 66.69   | 97.97  | 53.70  |
| Belgrade II 1  | 10.52 | 34.21 | 32.90  | 34671.38 | 513.88 | 49.80  | 72.15   | 56.61  | 46.32  |
| Belgrade II 2  | 11.35 | 36.37 | 29.42  | 34566.13 | 627.63 | 52.81  | 49.05   | 28.45  | 39.48  |
| Belgrade II 3  | 10.48 | 32.33 | 29.98  | 36066.42 | 627.79 | 43.69  | 50.53   | 28.86  | 45.83  |
| Belgrade II 4  | 10.34 | 39.85 | 36.62  | 29409.41 | 477.58 | 61.30  | 94.13   | 30.32  | 47.94  |
| Belgrade II 5  | 10.33 | 36.38 | 35.29  | 33402.31 | 568.50 | 67.75  | 65.30   | 39.05  | 68.23  |
| Belgrade II 6  | 8.77  | 22.78 | 33.86  | 30486.61 | 441.45 | 34.55  | 46.72   | 92.49  | 37.80  |
| Belgrade II 7  | 10.13 | 39.73 | 33.37  | 33130.86 | 546.63 | 52.67  | 60.86   | 39.71  | 54.63  |
| Belgrade II 8  | 10.62 | 31.75 | 44.31  | 34445.66 | 581.93 | 45.17  | 52.62   | 36.02  | 48.22  |



**Table S7.** Enrichment factor (EF) of PTEs in the studied urban soils.

| Sampling point | Co    | Cr    | Cu    | Mn    | Ni    | Pb     | Sr    | Zn    |
|----------------|-------|-------|-------|-------|-------|--------|-------|-------|
| Pancevo 1      | 2.018 | 1.321 | 1.211 | 1.310 | 1.749 | 2.729  | 0.616 | 0.620 |
| Pancevo 2      | 1.984 | 1.255 | 1.376 | 1.252 | 1.562 | 3.354  | 1.950 | 0.786 |
| Pancevo 3      | 1.954 | 1.233 | 1.260 | 1.296 | 1.986 | 2.594  | 0.501 | 0.865 |
| Pancevo 4      | 1.910 | 1.402 | 1.270 | 1.279 | 2.282 | 2.761  | 0.632 | 0.686 |
| Pancevo 5      | 2.072 | 1.548 | 1.320 | 1.292 | 2.143 | 2.886  | 0.546 | 0.602 |
| Pancevo 6      | 2.050 | 1.261 | 1.252 | 1.249 | 1.847 | 3.155  | 0.981 | 0.725 |
| Pancevo 7      | 1.907 | 1.374 | 1.174 | 1.129 | 2.017 | 2.683  | 0.915 | 0.915 |
| Pancevo 8      | 2.072 | 1.173 | 1.232 | 1.338 | 1.666 | 2.570  | 0.542 | 0.608 |
| Smederevo 1    | 1.112 | 1.008 | 0.651 | 0.553 | 0.770 | 1.211  | 0.384 | 0.732 |
| Smederevo 2    | 1.145 | 0.801 | 0.641 | 0.613 | 0.722 | 0.830  | 0.374 | 1.137 |
| Smederevo 3    | 1.086 | 1.044 | 0.642 | 0.558 | 1.007 | 3.091  | 0.440 | 0.665 |
| Smederevo 4    | 1.091 | 1.112 | 0.646 | 0.662 | 1.013 | 1.359  | 0.322 | 0.717 |
| Smederevo 5    | 1.036 | 0.691 | 0.398 | 0.456 | 0.655 | 0.939  | 0.387 | 0.449 |
| Smederevo 6    | 1.272 | 1.378 | 0.690 | 0.644 | 1.138 | 1.449  | 0.805 | 1.286 |
| Smederevo 7    | 1.098 | 0.650 | 0.677 | 0.666 | 0.506 | 1.189  | 0.409 | 0.928 |
| Smederevo 8    | 1.066 | 0.874 | 1.148 | 0.634 | 0.902 | 2.185  | 0.348 | 0.887 |
| Obrenovac 1    | 1.197 | 0.686 | 1.254 | 1.060 | 0.654 | 1.536  | 0.294 | 0.593 |
| Obrenovac 2    | 1.193 | 0.804 | 1.717 | 0.861 | 0.788 | 1.959  | 0.523 | 1.073 |
| Obrenovac 3    | 1.074 | 0.624 | 1.413 | 0.813 | 0.648 | 1.750  | 1.571 | 0.667 |
| Obrenovac 4    | 1.142 | 0.711 | 1.403 | 0.877 | 0.726 | 2.113  | 0.480 | 0.738 |
| Obrenovac 5    | 1.051 | 0.568 | 1.353 | 0.835 | 0.623 | 2.162  | 2.307 | 0.749 |
| Obrenovac 6    | 1.117 | 0.764 | 1.354 | 0.788 | 0.767 | 1.780  | 1.152 | 0.919 |
| Obrenovac 7    | 1.137 | 0.690 | 1.427 | 0.883 | 0.688 | 1.806  | 0.939 | 0.778 |
| Obrenovac 8    | 1.145 | 0.624 | 1.494 | 0.900 | 0.585 | 1.424  | 0.830 | 0.707 |
| Beograd I 1    | 1.160 | 0.409 | 1.251 | 0.814 | 0.586 | 3.246  | 0.760 | 2.020 |
| Beograd I 2    | 1.137 | 0.363 | 0.973 | 0.840 | 0.572 | 1.322  | 0.735 | 0.769 |
| Beograd I 3    | 1.080 | 0.383 | 1.069 | 0.854 | 0.518 | 1.245  | 0.243 | 1.178 |
| Beograd I 4    | 1.021 | 0.488 | 1.894 | 0.851 | 0.648 | 7.736  | 0.643 | 2.180 |
| Beograd I 5    | 0.964 | 0.319 | 2.993 | 0.723 | 0.446 | 39.566 | 0.302 | 3.719 |
| Beograd I 6    | 1.120 | 0.413 | 1.064 | 0.931 | 0.446 | 2.351  | 0.276 | 1.162 |
| Beograd I 7    | 1.228 | 0.545 | 1.723 | 0.792 | 0.786 | 4.837  | 0.680 | 2.720 |
| Beograd I 8    | 1.149 | 0.335 | 0.975 | 0.812 | 0.480 | 1.510  | 0.367 | 0.661 |
| Beograd II 1   | 1.115 | 0.401 | 0.783 | 0.750 | 0.494 | 1.393  | 0.181 | 0.487 |
| Beograd II 2   | 1.207 | 0.427 | 0.703 | 0.919 | 0.526 | 0.950  | 0.091 | 0.416 |
| Beograd II 3   | 1.068 | 0.364 | 0.686 | 0.881 | 0.417 | 0.938  | 0.089 | 0.463 |
| Beograd II 4   | 1.292 | 0.550 | 1.028 | 0.822 | 0.717 | 2.143  | 0.114 | 0.594 |
| Beograd II 5   | 1.137 | 0.442 | 0.872 | 0.862 | 0.698 | 1.309  | 0.130 | 0.744 |
| Beograd II 6   | 1.057 | 0.303 | 0.917 | 0.733 | 0.390 | 1.026  | 0.336 | 0.452 |
| Beograd II 7   | 1.124 | 0.487 | 0.832 | 0.835 | 0.547 | 1.230  | 0.133 | 0.601 |
| Beograd II 8   | 1.134 | 0.374 | 1.062 | 0.855 | 0.451 | 1.023  | 0.116 | 0.510 |

**Table S8.** Contamination factor (Cf) of PTEs in the studied urban soils.

| Sampling point | Co    | Cr    | Cu    | Fe    | Mn    | Ni    | Pb     | Sr    | Zn    |
|----------------|-------|-------|-------|-------|-------|-------|--------|-------|-------|
| Pancevo 1      | 1.331 | 0.871 | 0.237 | 0.660 | 0.864 | 1.154 | 1.800  | 0.406 | 0.207 |
| Pancevo 2      | 1.315 | 0.833 | 0.234 | 0.663 | 0.830 | 1.036 | 2.224  | 1.293 | 0.260 |
| Pancevo 3      | 1.207 | 0.761 | 0.215 | 0.618 | 0.800 | 1.226 | 1.602  | 0.310 | 0.276 |
| Pancevo 4      | 1.305 | 0.958 | 0.232 | 0.683 | 0.874 | 1.560 | 1.887  | 0.432 | 0.216 |
| Pancevo 5      | 1.363 | 1.018 | 0.243 | 0.658 | 0.850 | 1.409 | 1.898  | 0.359 | 0.239 |
| Pancevo 6      | 1.296 | 0.797 | 0.231 | 0.632 | 0.790 | 1.168 | 1.995  | 0.620 | 0.211 |
| Pancevo 7      | 1.223 | 0.881 | 0.218 | 0.641 | 0.724 | 1.294 | 1.721  | 0.587 | 0.506 |
| Pancevo 8      | 1.374 | 0.778 | 0.245 | 0.663 | 0.888 | 1.105 | 1.704  | 0.360 | 0.407 |
| Smederevo 1    | 1.417 | 1.284 | 0.169 | 1.274 | 0.704 | 0.981 | 1.543  | 0.867 | 0.498 |
| Smederevo 2    | 1.477 | 1.033 | 0.176 | 1.290 | 0.791 | 0.931 | 1.070  | 0.855 | 0.565 |
| Smederevo 3    | 1.314 | 1.263 | 0.157 | 1.210 | 0.675 | 1.219 | 3.742  | 0.945 | 0.456 |
| Smederevo 4    | 1.405 | 1.432 | 0.167 | 1.288 | 0.852 | 1.304 | 1.750  | 0.735 | 0.412 |
| Smederevo 5    | 1.734 | 1.158 | 0.207 | 1.674 | 0.764 | 1.097 | 1.572  | 1.150 | 0.283 |
| Smederevo 6    | 0.964 | 1.044 | 0.115 | 0.758 | 0.488 | 0.862 | 1.098  | 1.081 | 0.431 |
| Smederevo 7    | 1.210 | 0.717 | 0.144 | 1.102 | 0.735 | 0.557 | 1.310  | 0.799 | 0.309 |
| Smederevo 8    | 1.335 | 1.094 | 0.159 | 1.252 | 0.794 | 1.129 | 2.735  | 0.772 | 0.324 |
| Obrenovac 1    | 1.677 | 0.684 | 0.525 | 0.997 | 1.057 | 0.652 | 1.531  | 0.404 | 0.219 |
| Obrenovac 2    | 1.498 | 0.718 | 0.469 | 0.893 | 0.769 | 0.704 | 1.749  | 0.645 | 0.299 |
| Obrenovac 3    | 1.175 | 0.486 | 0.368 | 0.778 | 0.633 | 0.504 | 1.362  | 1.686 | 0.161 |
| Obrenovac 4    | 1.496 | 0.663 | 0.468 | 0.932 | 0.818 | 0.677 | 1.970  | 0.617 | 0.289 |
| Obrenovac 5    | 0.928 | 0.357 | 0.290 | 0.629 | 0.525 | 0.392 | 1.359  | 2.000 | 0.261 |
| Obrenovac 6    | 1.316 | 0.640 | 0.412 | 0.838 | 0.661 | 0.643 | 1.492  | 1.332 | 0.228 |
| Obrenovac 7    | 1.342 | 0.579 | 0.420 | 0.839 | 0.741 | 0.578 | 1.516  | 1.087 | 0.146 |
| Obrenovac 8    | 1.301 | 0.504 | 0.407 | 0.809 | 0.727 | 0.473 | 1.151  | 0.926 | 0.147 |
| Beograd I 1    | 1.185 | 0.418 | 0.266 | 1.022 | 0.832 | 0.599 | 3.317  | 2.230 | 0.153 |
| Beograd I 2    | 1.319 | 0.421 | 0.296 | 1.160 | 0.975 | 0.664 | 1.533  | 2.449 | 0.160 |
| Beograd I 3    | 1.235 | 0.438 | 0.277 | 1.143 | 0.976 | 0.593 | 1.424  | 0.800 | 0.133 |
| Beograd I 4    | 0.961 | 0.459 | 0.216 | 0.941 | 0.801 | 0.610 | 7.281  | 1.738 | 0.173 |
| Beograd I 5    | 1.153 | 0.382 | 0.259 | 1.196 | 0.865 | 0.533 | 47.308 | 1.035 | 0.205 |
| Beograd I 6    | 1.345 | 0.496 | 0.302 | 1.201 | 1.118 | 0.535 | 2.823  | 0.952 | 0.139 |
| Beograd I 7    | 1.325 | 0.588 | 0.298 | 1.079 | 0.855 | 0.848 | 5.221  | 2.108 | 0.195 |
| Beograd I 8    | 1.372 | 0.400 | 0.308 | 1.194 | 0.970 | 0.573 | 1.803  | 1.259 | 0.208 |
| Beograd II 1   | 1.561 | 0.561 | 0.351 | 1.400 | 1.050 | 0.692 | 1.950  | 0.728 | 0.185 |
| Beograd II 2   | 1.684 | 0.596 | 0.378 | 1.395 | 1.283 | 0.733 | 1.326  | 0.366 | 0.228 |
| Beograd II 3   | 1.555 | 0.530 | 0.349 | 1.456 | 1.283 | 0.607 | 1.366  | 0.371 | 0.208 |
| Beograd II 4   | 1.533 | 0.653 | 0.345 | 1.187 | 0.976 | 0.851 | 2.544  | 0.390 | 0.130 |
| Beograd II 5   | 1.533 | 0.596 | 0.344 | 1.348 | 1.162 | 0.941 | 1.765  | 0.502 | 0.227 |
| Beograd II 6   | 1.301 | 0.373 | 0.292 | 1.231 | 0.902 | 0.480 | 1.263  | 1.189 | 0.181 |
| Beograd II 7   | 1.503 | 0.651 | 0.338 | 1.337 | 1.117 | 0.731 | 1.645  | 0.511 | 0.000 |
| Beograd II 8   | 1.576 | 0.521 | 0.354 | 1.391 | 1.189 | 0.627 | 1.422  | 0.463 | 0.000 |

**Table S9.** Ecological risk index (Ei) of PTEs in the studied urban soils.

| Sampling point | Cr    | Cu    | Ni    | Pb      | Zn    |
|----------------|-------|-------|-------|---------|-------|
| Pancevo 1      | 1.743 | 1.185 | 5.769 | 9.001   | 0.207 |
| Pancevo 2      | 1.665 | 1.171 | 5.180 | 11.122  | 0.260 |
| Pancevo 3      | 1.523 | 1.074 | 6.132 | 8.011   | 0.276 |
| Pancevo 4      | 1.916 | 1.162 | 7.799 | 9.435   | 0.216 |
| Pancevo 5      | 2.036 | 1.213 | 7.046 | 9.489   | 0.239 |
| Pancevo 6      | 1.594 | 1.154 | 5.839 | 9.973   | 0.211 |
| Pancevo 7      | 1.763 | 1.089 | 6.468 | 8.606   | 0.506 |
| Pancevo 8      | 1.556 | 1.223 | 5.524 | 8.522   | 0.407 |
| Smederevo 1    | 2.568 | 0.844 | 4.905 | 7.717   | 0.498 |
| Smederevo 2    | 2.067 | 0.880 | 4.656 | 5.352   | 0.565 |
| Smederevo 3    | 2.527 | 0.783 | 6.097 | 18.708  | 0.456 |
| Smederevo 4    | 2.864 | 0.837 | 6.521 | 8.748   | 0.412 |
| Smederevo 5    | 2.315 | 1.033 | 5.486 | 7.862   | 0.283 |
| Smederevo 6    | 2.088 | 0.574 | 4.310 | 5.489   | 0.431 |
| Smederevo 7    | 1.434 | 0.721 | 2.787 | 6.552   | 0.309 |
| Smederevo 8    | 2.188 | 0.795 | 5.647 | 13.675  | 0.324 |
| Obrenovac 1    | 1.367 | 2.623 | 3.259 | 7.656   | 0.219 |
| Obrenovac 2    | 1.436 | 2.343 | 3.519 | 8.746   | 0.299 |
| Obrenovac 3    | 0.971 | 1.838 | 2.521 | 6.809   | 0.161 |
| Obrenovac 4    | 1.326 | 2.340 | 3.383 | 9.852   | 0.289 |
| Obrenovac 5    | 0.714 | 1.452 | 1.959 | 6.795   | 0.261 |
| Obrenovac 6    | 1.281 | 2.059 | 3.216 | 7.460   | 0.228 |
| Obrenovac 7    | 1.158 | 2.099 | 2.889 | 7.582   | 0.146 |
| Obrenovac 8    | 1.009 | 2.036 | 2.367 | 5.757   | 0.147 |
| Beograd I 1    | 0.837 | 1.332 | 2.996 | 16.587  | 0.153 |
| Beograd I 2    | 0.843 | 1.481 | 3.320 | 7.664   | 0.160 |
| Beograd I 3    | 0.877 | 1.387 | 2.964 | 7.120   | 0.133 |
| Beograd I 4    | 0.918 | 1.080 | 3.049 | 36.406  | 0.173 |
| Beograd I 5    | 0.763 | 1.295 | 2.665 | 236.538 | 0.205 |
| Beograd I 6    | 0.993 | 1.511 | 2.677 | 14.115  | 0.139 |
| Beograd I 7    | 1.177 | 1.489 | 4.241 | 26.104  | 0.195 |
| Beograd I 8    | 0.800 | 1.541 | 2.865 | 9.013   | 0.208 |
| Beograd II 1   | 1.122 | 1.754 | 3.458 | 9.750   | 0.185 |
| Beograd II 2   | 1.192 | 1.892 | 3.667 | 6.628   | 0.228 |
| Beograd II 3   | 1.060 | 1.746 | 3.034 | 6.829   | 0.208 |
| Beograd II 4   | 1.306 | 1.723 | 4.257 | 12.720  | 0.130 |
| Beograd II 5   | 1.193 | 1.722 | 4.705 | 8.825   | 0.227 |
| Beograd II 6   | 0.747 | 1.461 | 2.399 | 6.313   | 0.181 |
| Beograd II 7   | 1.303 | 1.689 | 3.657 | 8.224   | 0.000 |
| Beograd II 8   | 1.041 | 1.771 | 3.137 | 7.111   | 0.000 |

**Table S10.** Degree of contamination (Cdeg) and Potential Ecological risk (RI) of PTEs in the studied urban soils.

| Sampling point | Cdeg   | RI      |
|----------------|--------|---------|
| Pancevo 1      | 7.530  | 17.904  |
| Pancevo 2      | 8.689  | 19.399  |
| Pancevo 3      | 7.015  | 17.016  |
| Pancevo 4      | 8.148  | 20.529  |
| Pancevo 5      | 8.036  | 20.024  |
| Pancevo 6      | 7.740  | 18.772  |
| Pancevo 7      | 7.796  | 18.432  |
| Pancevo 8      | 7.524  | 17.234  |
| Smederevo 1    | 8.737  | 16.532  |
| Smederevo 2    | 8.188  | 13.520  |
| Smederevo 3    | 10.983 | 28.571  |
| Smederevo 4    | 9.346  | 19.382  |
| Smederevo 5    | 9.639  | 16.978  |
| Smederevo 6    | 6.841  | 12.893  |
| Smederevo 7    | 6.883  | 11.802  |
| Smederevo 8    | 9.595  | 22.629  |
| Obrenovac 1    | 7.746  | 15.124  |
| Obrenovac 2    | 7.743  | 16.343  |
| Obrenovac 3    | 7.153  | 12.300  |
| Obrenovac 4    | 7.930  | 17.191  |
| Obrenovac 5    | 6.742  | 11.182  |
| Obrenovac 6    | 7.562  | 14.244  |
| Obrenovac 7    | 7.248  | 13.873  |
| Obrenovac 8    | 6.447  | 11.315  |
| Beograd I 1    | 10.024 | 21.904  |
| Beograd I 2    | 8.976  | 13.468  |
| Beograd I 3    | 7.020  | 12.481  |
| Beograd I 4    | 13.180 | 41.625  |
| Beograd I 5    | 52.935 | 241.467 |
| Beograd I 6    | 8.911  | 19.435  |
| Beograd I 7    | 12.518 | 33.206  |
| Beograd I 8    | 8.087  | 14.427  |
| Beograd II 1   | 8.477  | 16.269  |
| Beograd II 2   | 7.989  | 13.607  |
| Beograd II 3   | 7.724  | 12.877  |
| Beograd II 4   | 8.610  | 20.135  |
| Beograd II 5   | 8.419  | 16.671  |
| Beograd II 6   | 7.212  | 11.102  |
| Beograd II 7   | 7.834  | 14.872  |
| Beograd II 8   | 7.543  | 13.060  |

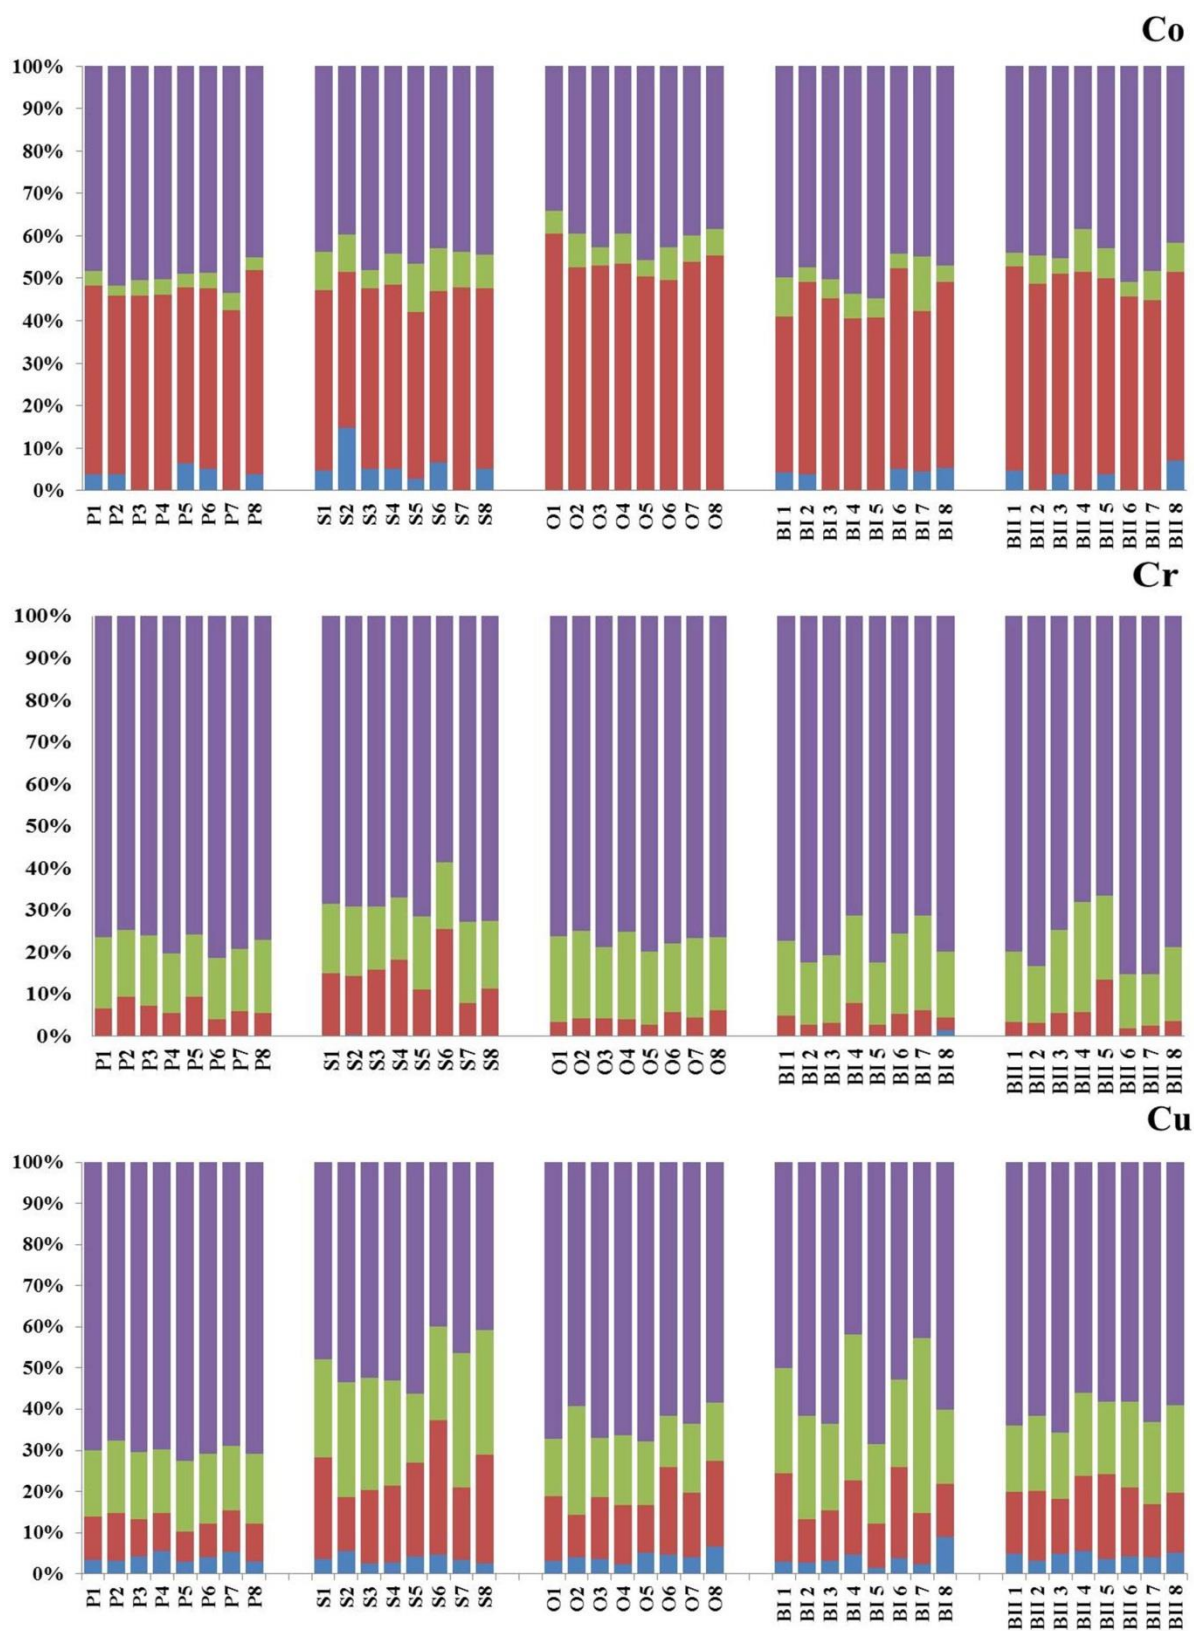

Figure S1. Fractionation profile of Co, Cr and Cu in the studied soils.

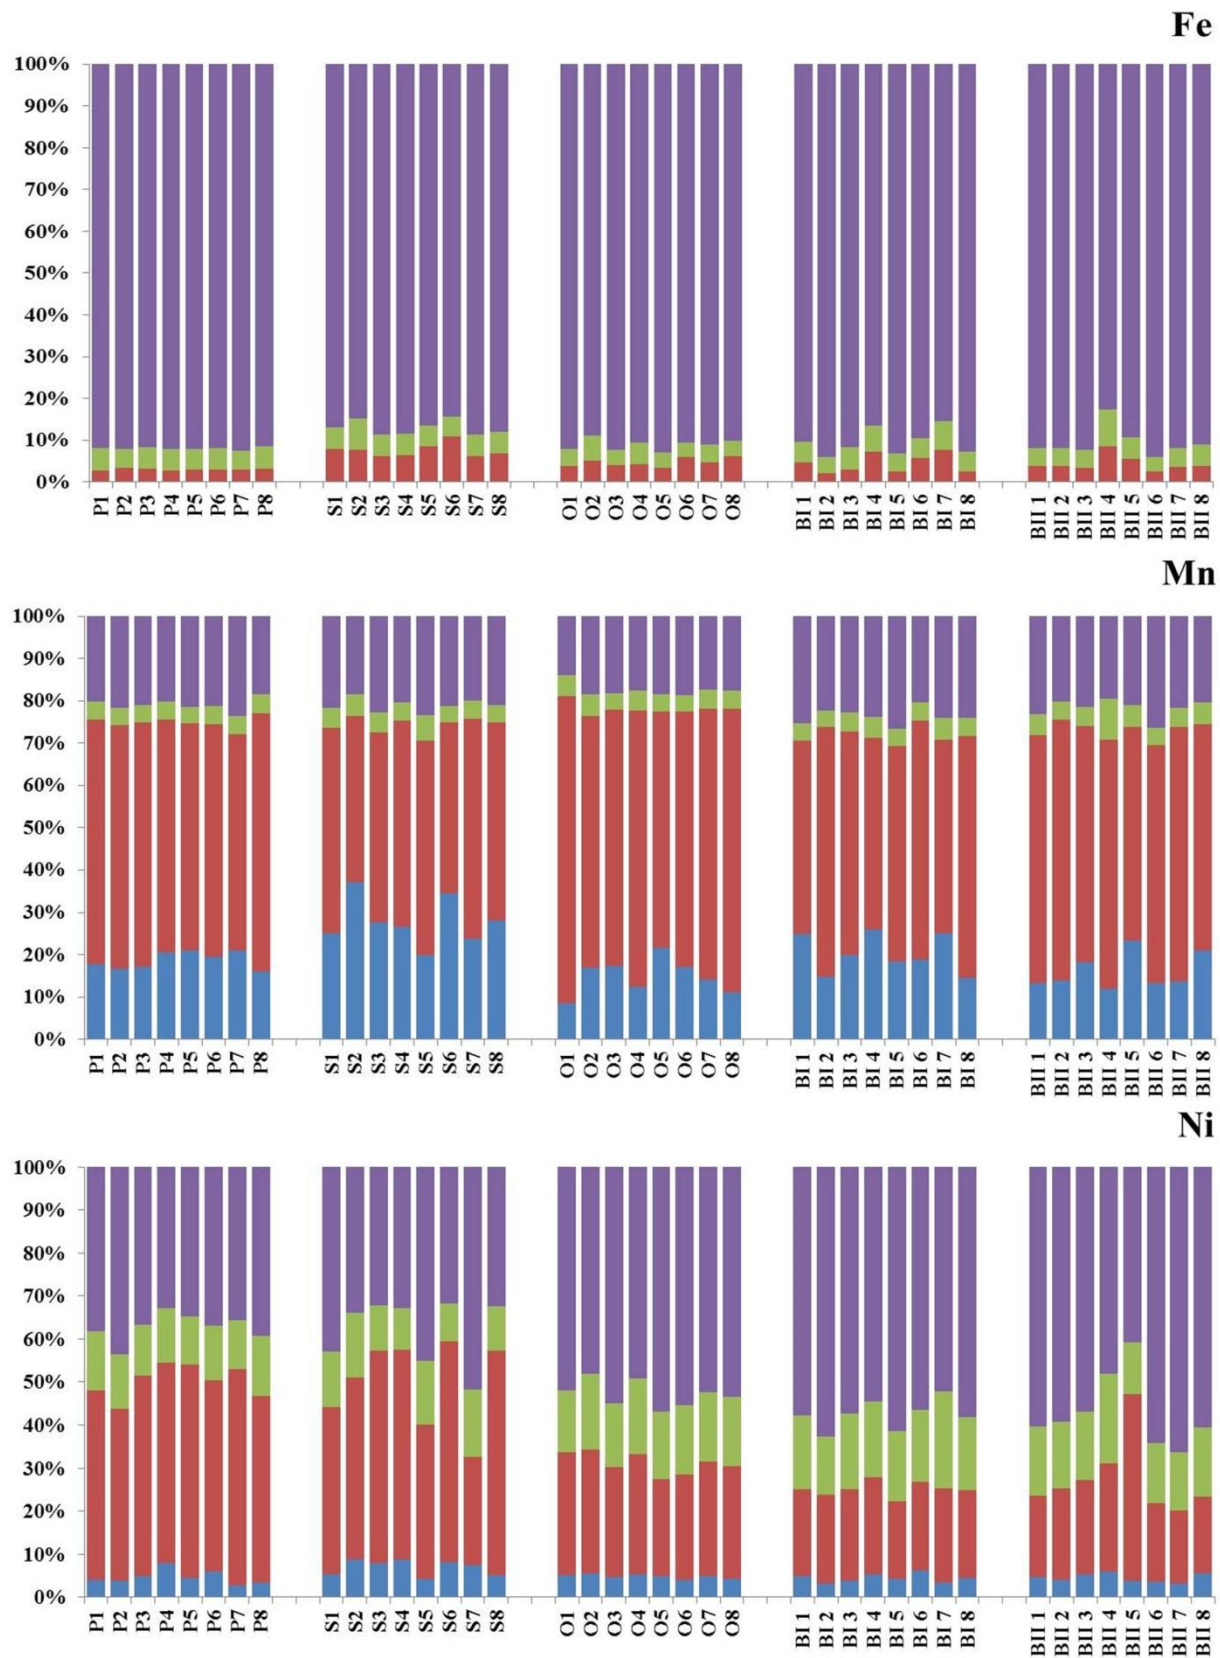

Figure S2. Fractionation profile of Fe, Mn and Ni in the studied soils.

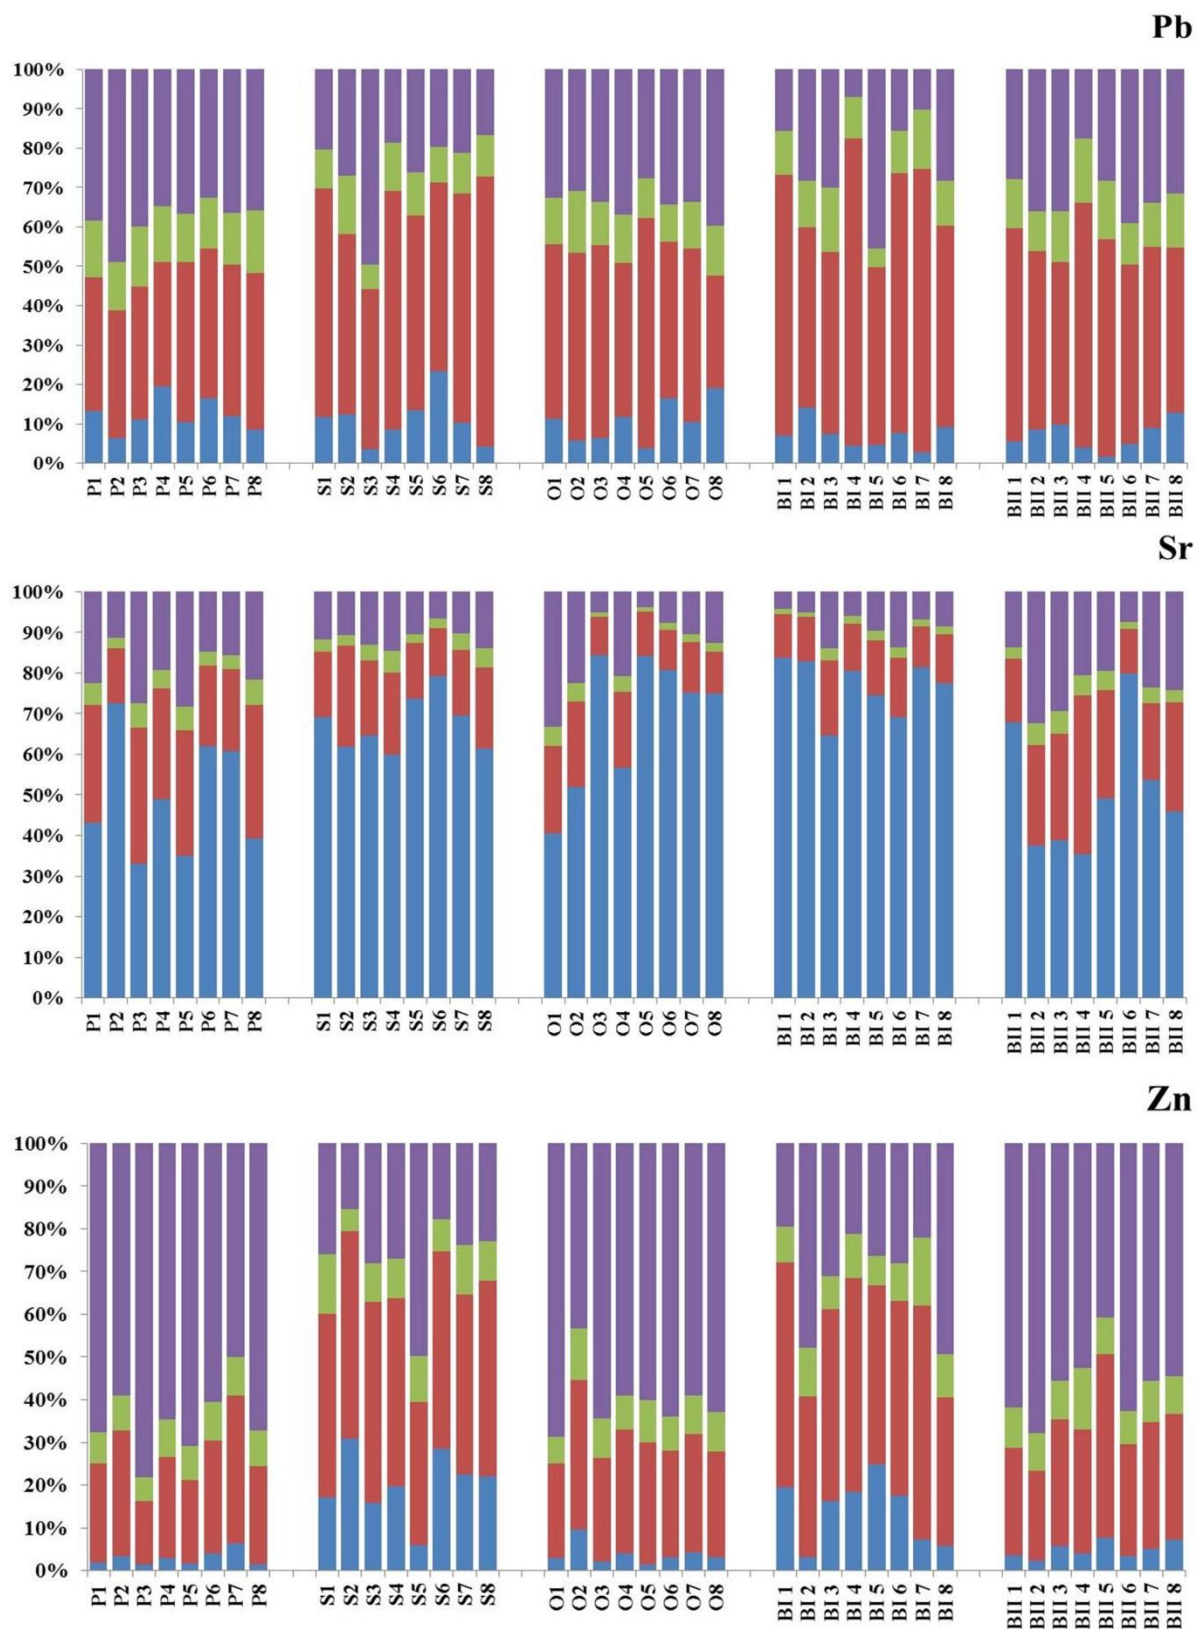

Figure S3. Fractionation profile of Pb, Sr and Zn in the studied soils.

## References:

1. Chen, R., Chen, H., Song, L., Yao, Z., Meng, F., Yanguo Teng, Y. (2019). Characterization and source apportionment of heavy metals in the sediments of Lake Tai (China) and its surrounding soils. *Science of the Total Environment*, 694, 133819. <https://doi.org/10.1016/j.scitotenv.2019.133819>
2. Čakmak, D., Perović, V., Kresović, M., Pavlović, D., Pavlović, M., Mitrović, M., & Pavlović, P. (2020). Sources and health risk assessment of potentially toxic elements in dust at children's playgrounds with artificial surfaces: A case study in Belgrade. *Archives of Environmental Contamination and Toxicology*, 78, 190-205. <https://doi.org/10.1007/s00244-019-00702-0>
3. Hakanson, L. (1980). An ecological risk index for aquatic pollution control. A sedimentological approach. *Water Research*, 14, 975-1001. [https://doi.org/10.1016/0043-1354\(80\)90143-8](https://doi.org/10.1016/0043-1354(80)90143-8)
4. Imperato, M., Adamo, P., Naimo, D., Arienzo, M., Stanzione, D., Violante, P. (2003). Spatial distribution of heavy metals in urban soils of Naples city (Italy). *Environmental Pollution*, 124, 247-256. [https://doi.org/10.1016/S0269-7491\(02\)00478-5](https://doi.org/10.1016/S0269-7491(02)00478-5)
5. Jia, Z., Li, S., & Wang, L. (2018). Assessment of soil heavy metals for eco-environment and human health in a rapidly urbanization area of the upper Yangtze Basin. *Scientific Reports*, 8, 3256. <https://doi.org/10.1038/s41598-018-21569-6>
6. Knežević, M. (2014). Determination of the state, degree of pollution and chemical degradation of soil in industrial zones in Pančevo and Šabac, as well as fire sites on Mt. Tara (Project Contract No. 401-00-00051/2014-02). Ministry of agriculture and environmental protection. (in Serbian).
7. Mrvić, V., Zdravković, M., Sikirić, B., Čakmak, D., Kostić-Kravljanac, Lj. (2009). Harmful and hazardous elements in soil. In: V. Mrvić, G. Antonović, L. Martinović (Ed.) *The fertility and content of hazardous and harmful substances in the soils of Central Serbia* (1<sup>st</sup> ed., pp.75-144). Institute of Soil Science, Belgrade. (in Serbian).
8. Mrvić, V., Kostić-Kravljanac, Lj., Čakmak, D., Sikirić, B., Brebanović, B., Perović, V., & Nikoloski, M. (2011). Pedogeochemical mapping and background limit of trace elements in soils of Branicevo Province (Serbia). *Journal of Geochemical Exploration*, 109, 18-25. <https://doi.org/10.1016/j.gexplo.2010.09.005>
9. USDOE (2011). The risk assessment information system (RAIS). U.S. Department of Energy's Oak Ridge Operations Office (ORO).
10. USEPA (2020). Regional screening levels (RSLs) - User's Guide. Accessed date: 2 July 2020. <https://www.epa.gov/risk/regional-screening-levels-rsls-users-guide>.
